# Supplementary material for: Cd(II) and Pd(II) Mixed Ligand Complexes of Dithiocarbamate and Tertiary Phosphine Ligands—Spectroscopic, Anti-Microbial, and Computational Studies
Source: MDPI journal article supplement (doi:10.3390/molecules28052305), 2023-03-02

**Cd(II) and Pd(II) Mixed Ligand Complexes of  
Dithiocarbamate and Tertiary Phosphine  
Ligands—Spectroscopic,  
Anti-Microbial, and Computational Studies**

Tohama B. Abdullah , Reza Behjatmanesh-Ardakani, Ahmed S. Faihan,  
Hayfa M. Jirjes, Mortaga M. Abou-Krisha, Tarek A. Yousef, Sayed H. Kenawy  
and Ahmed S. M. Al-Janabi

**Figure S1.  $^{31}\text{P}$  nmr spectrum of complex (1)**

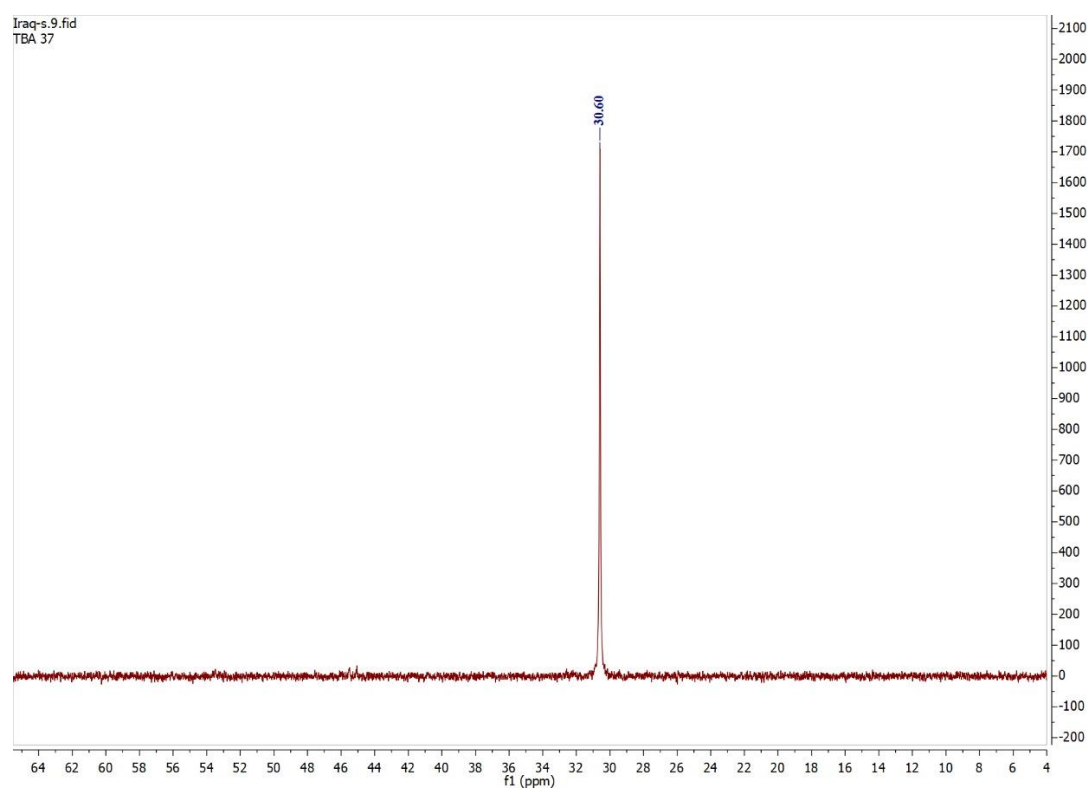

**Figure S2.  $^{31}\text{P}$  nmr spectrum of complex (2)**

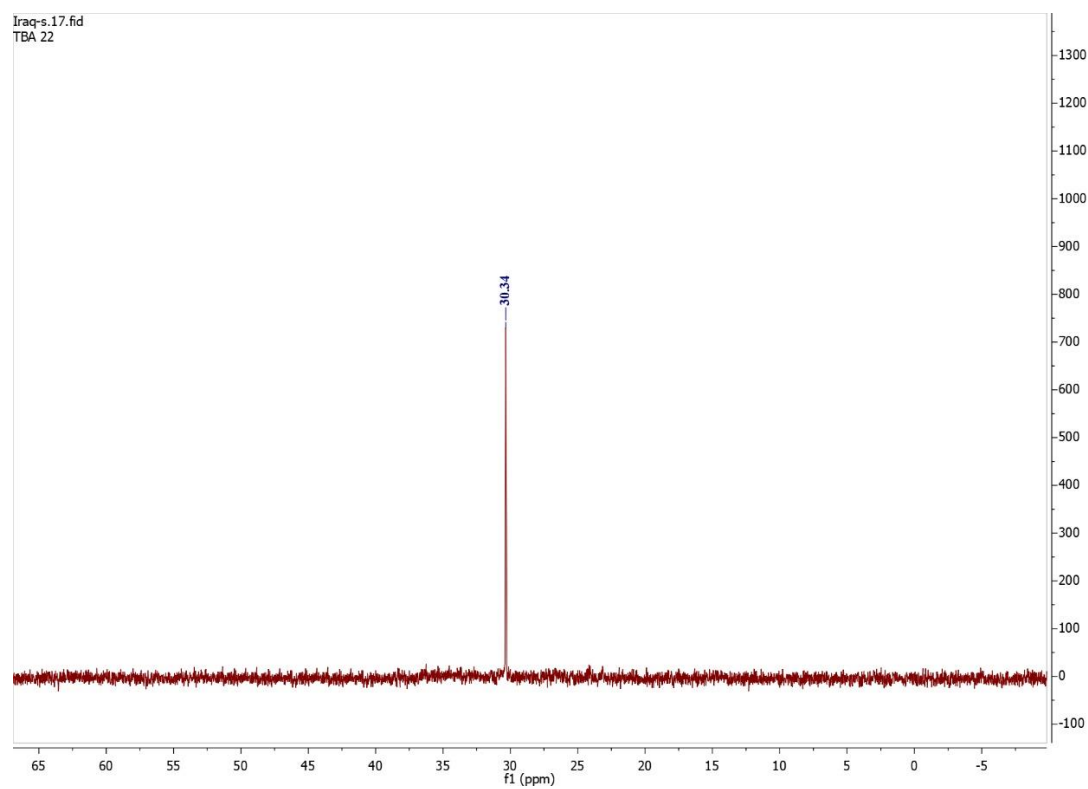

Figure S3.  $^{31}\text{P}$  nmr spectrum of complex (3)

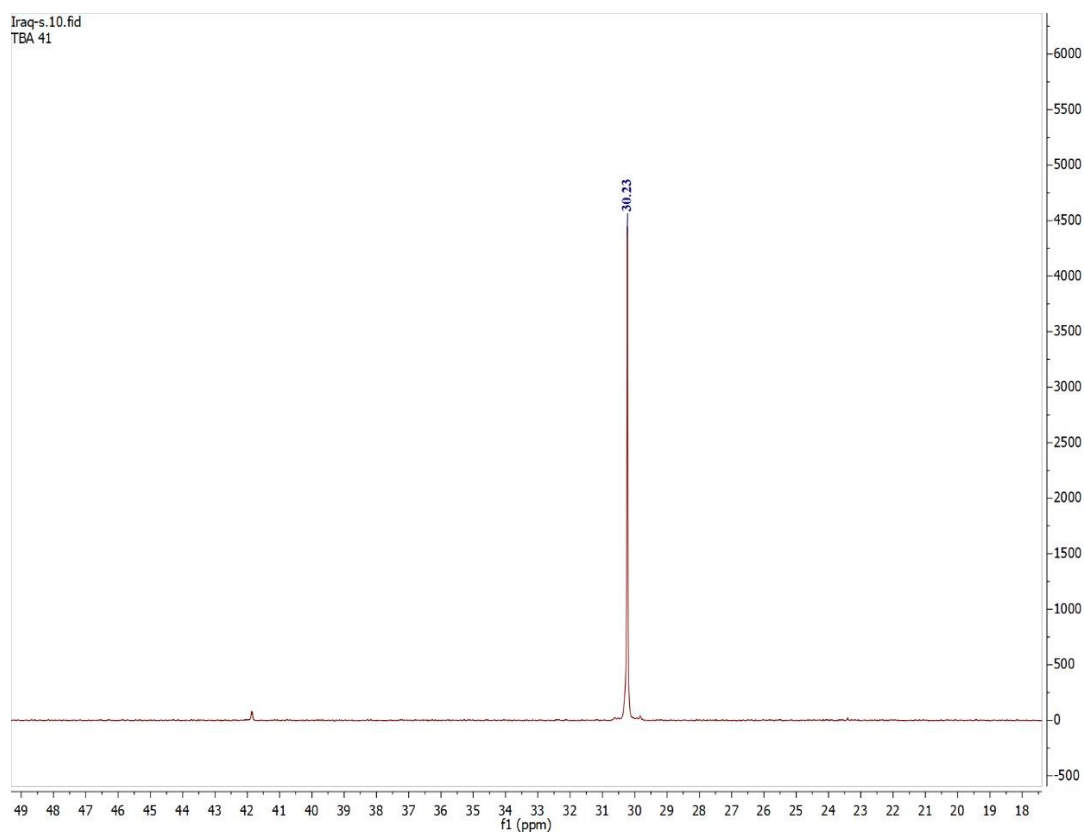

Figure S4.  $^{31}\text{P}$  nmr spectrum of complex (4)

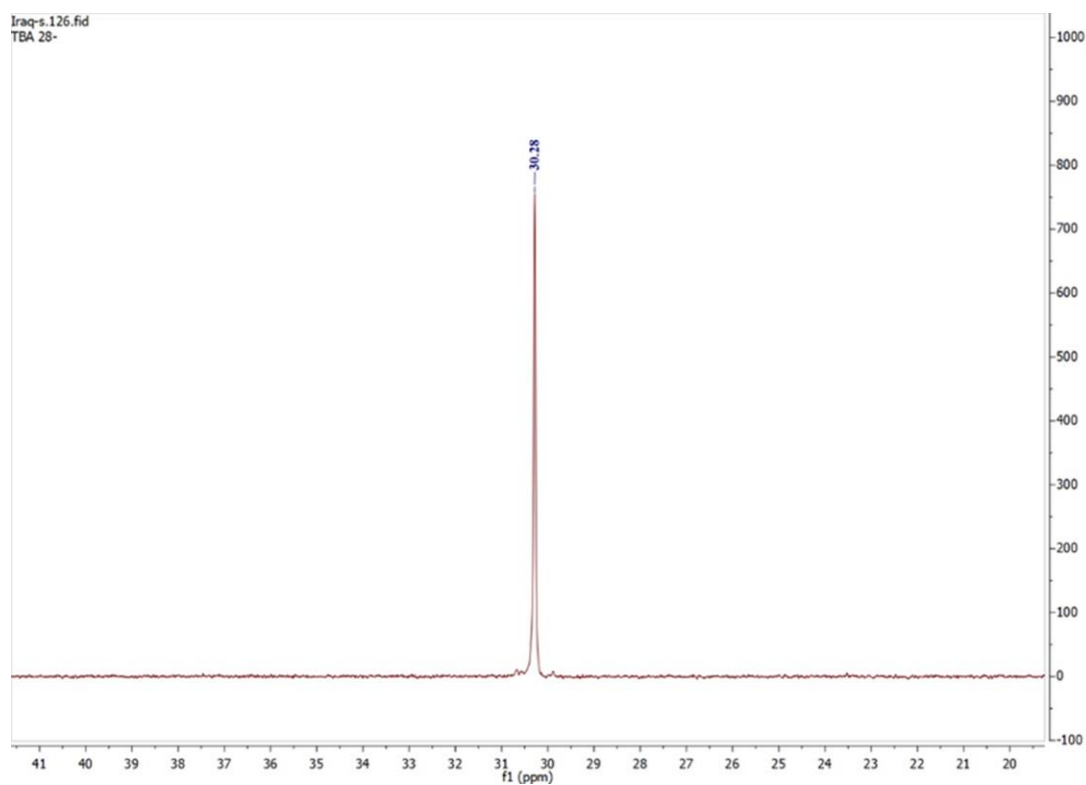

Figure S5.  $^{31}\text{P}$  nmr spectrum of complex (5)

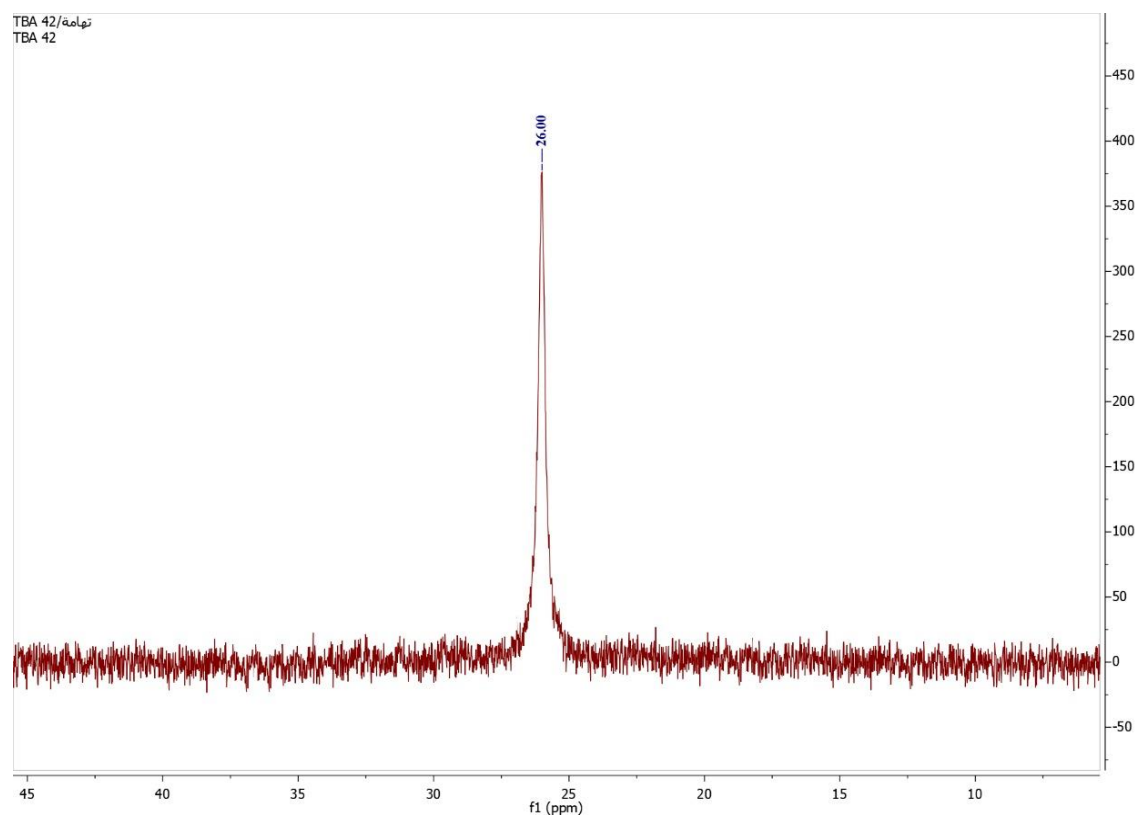

Figure S6.  $^{31}\text{P}$  nmr spectrum of complex (6)

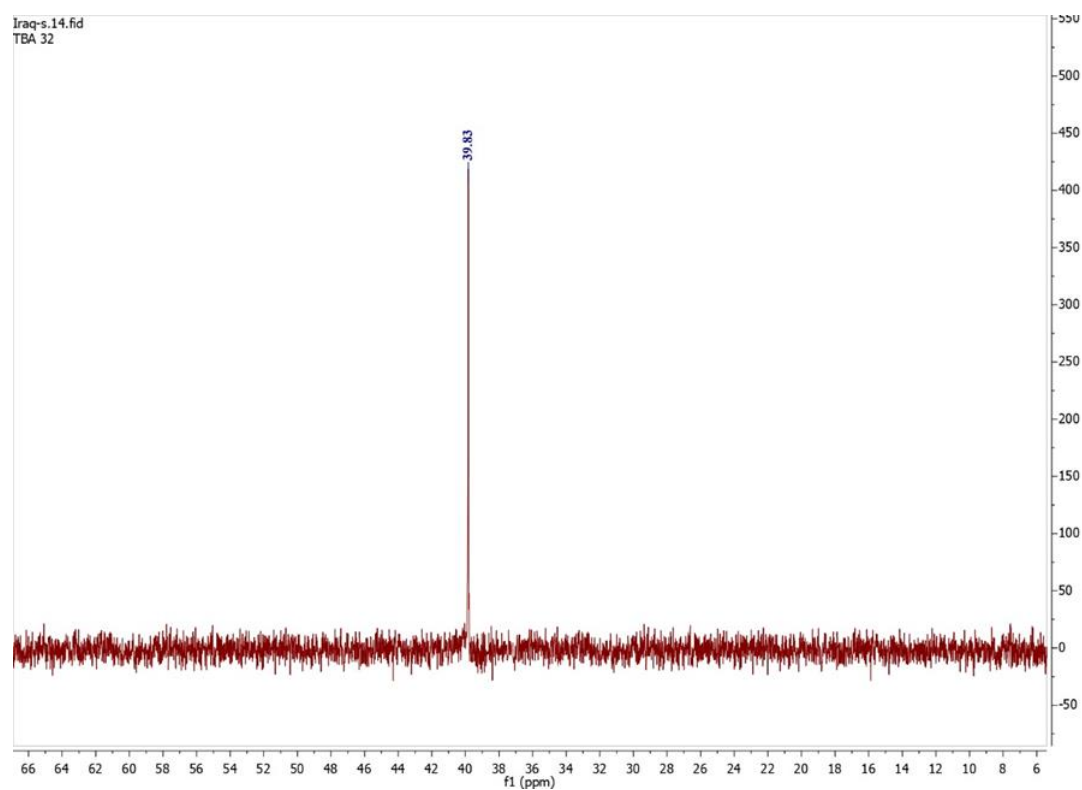

Figure S7.  $^{31}\text{P}$  nmr spectrum of complex (7)

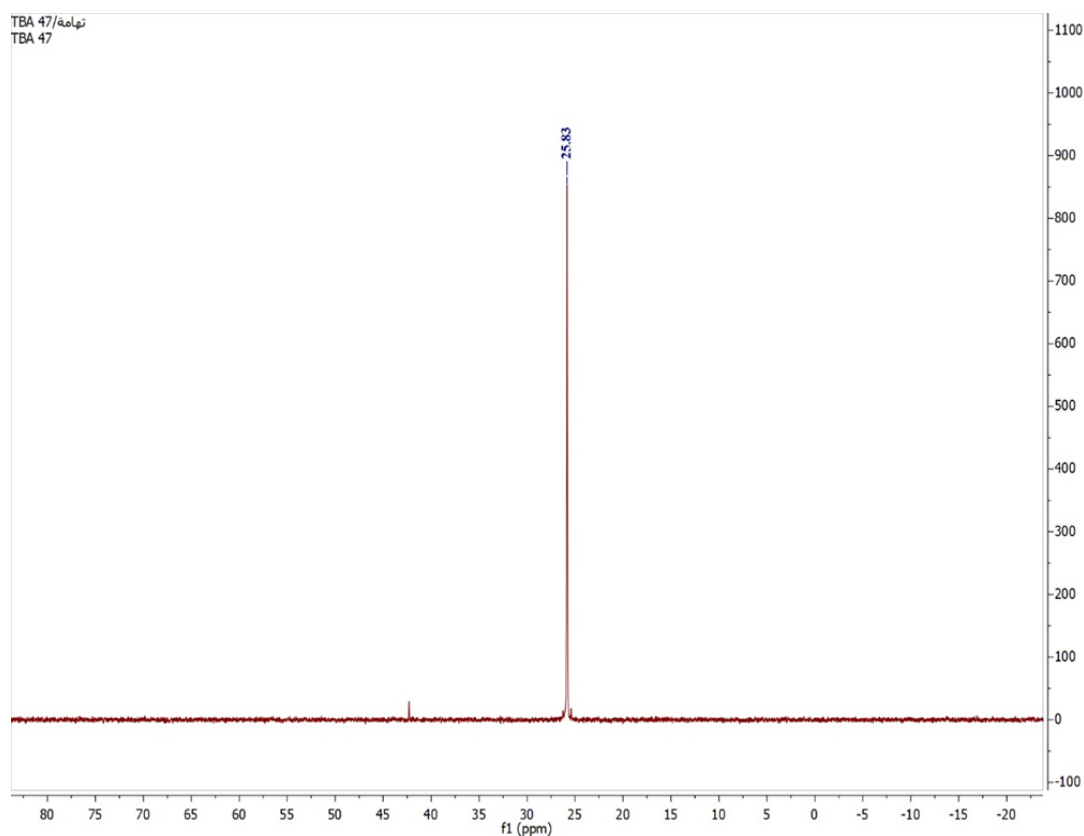

Figure S8.  $^1\text{H}$  nmr spectrum of complex (1)

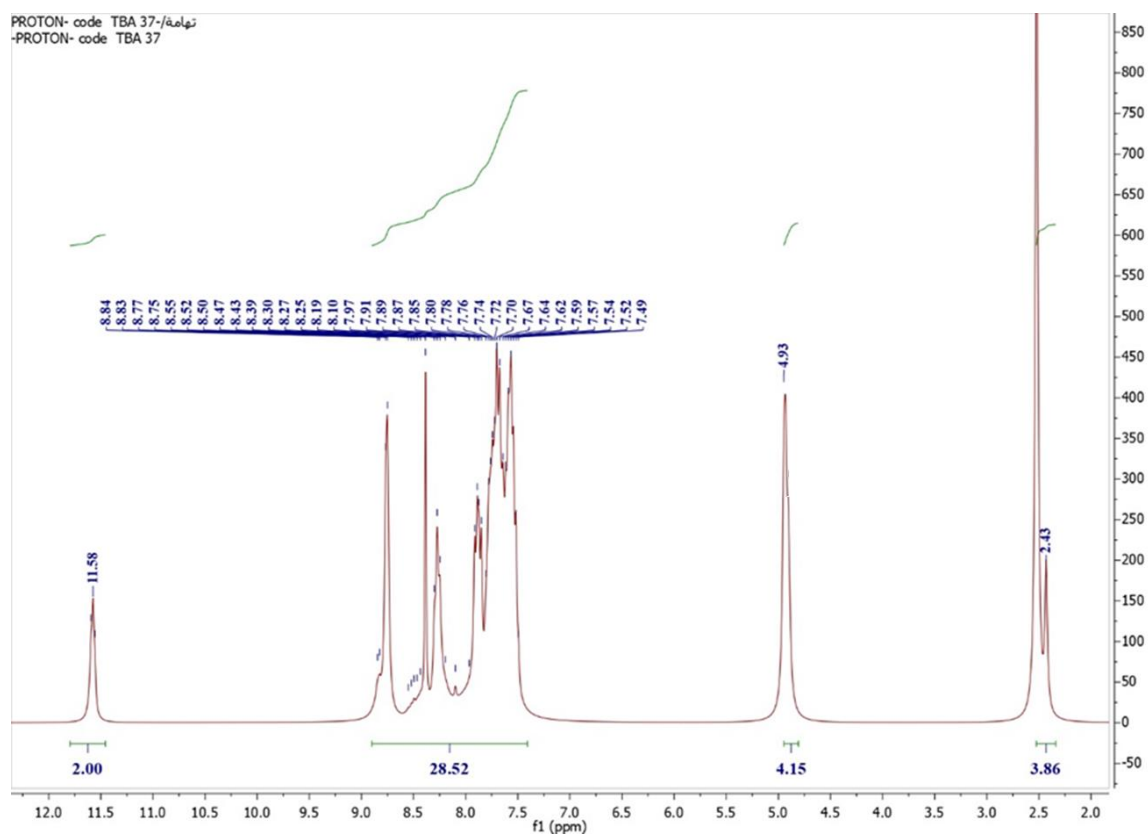

## Supplementary Information

Figure S9.  $^1\text{H}$  nmr spectrum of complex (2)

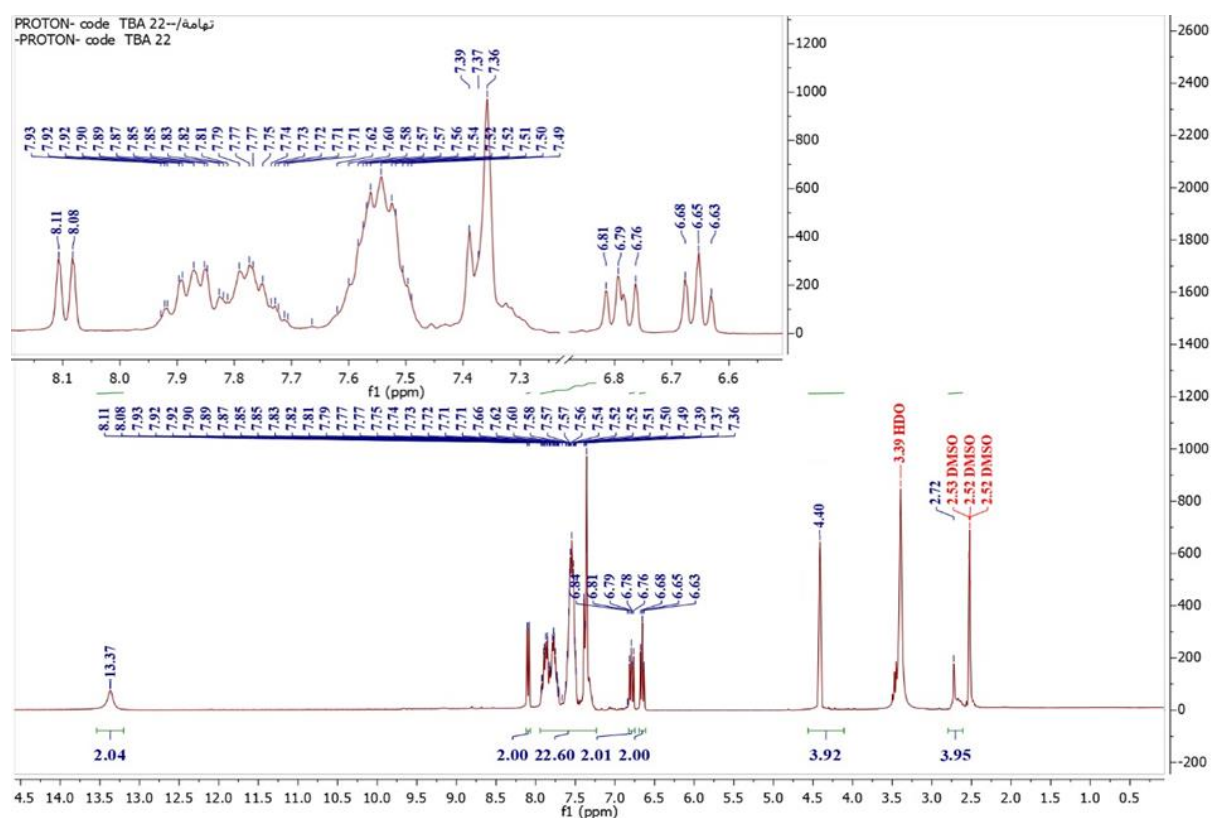

Figure S0.  $^1\text{H}$  nmr spectrum of complex (3)

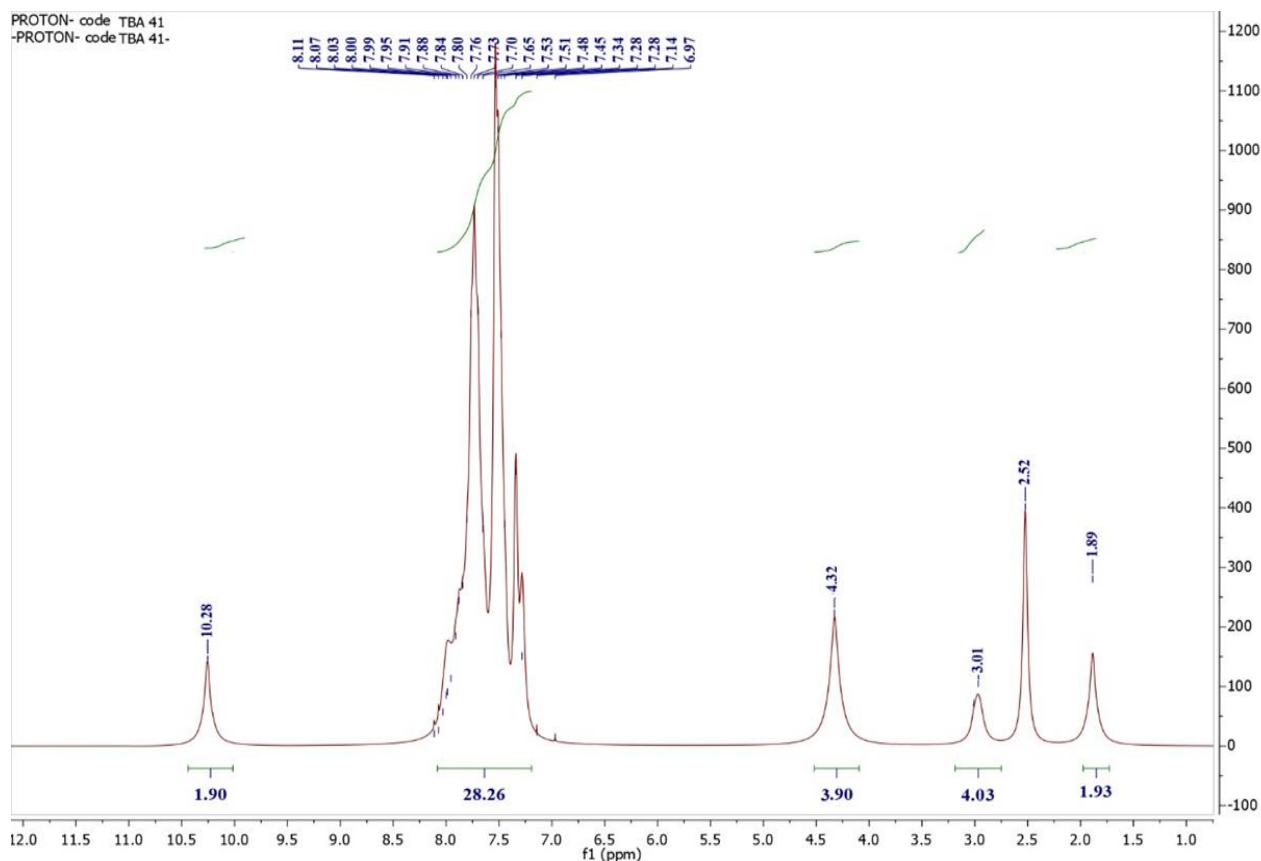

**Figure S11.  $^1\text{H}$  nmr spectrum of complex (5)**

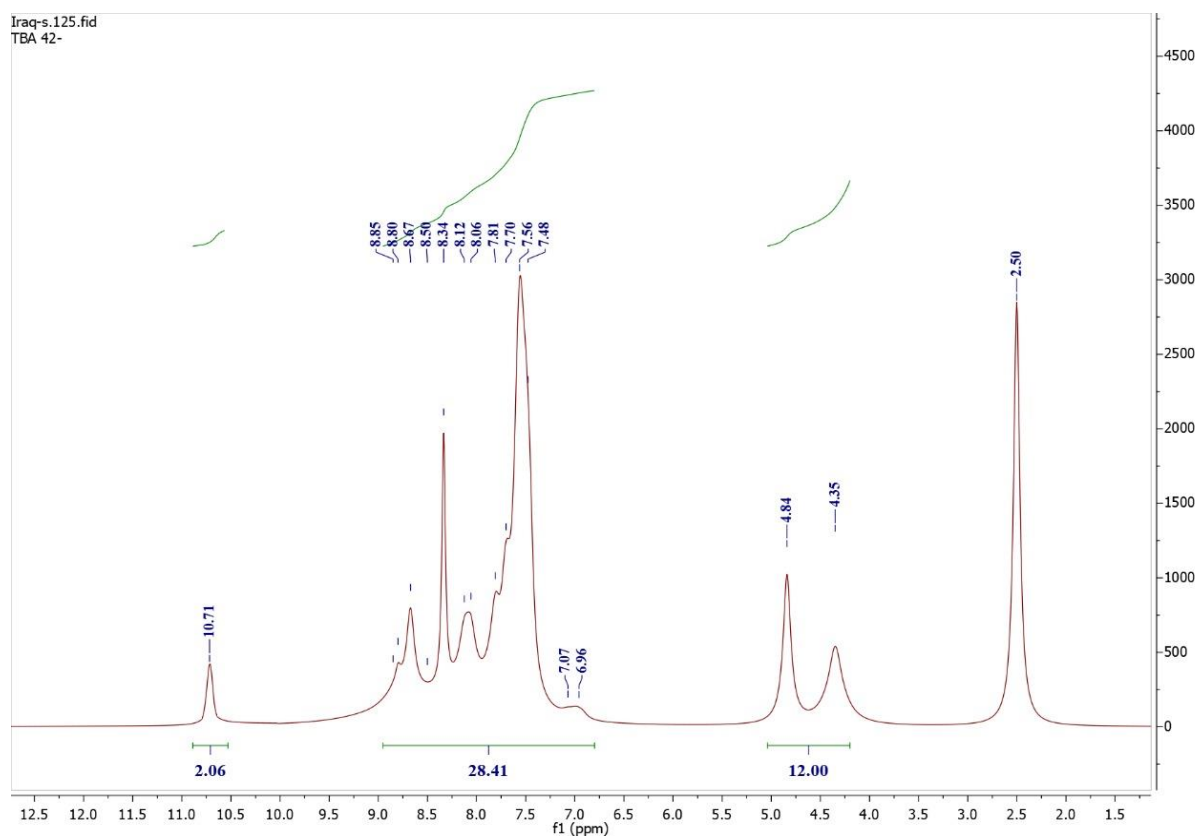

**Figure S12.  $^1\text{H}$  nmr spectrum of complex (6)**

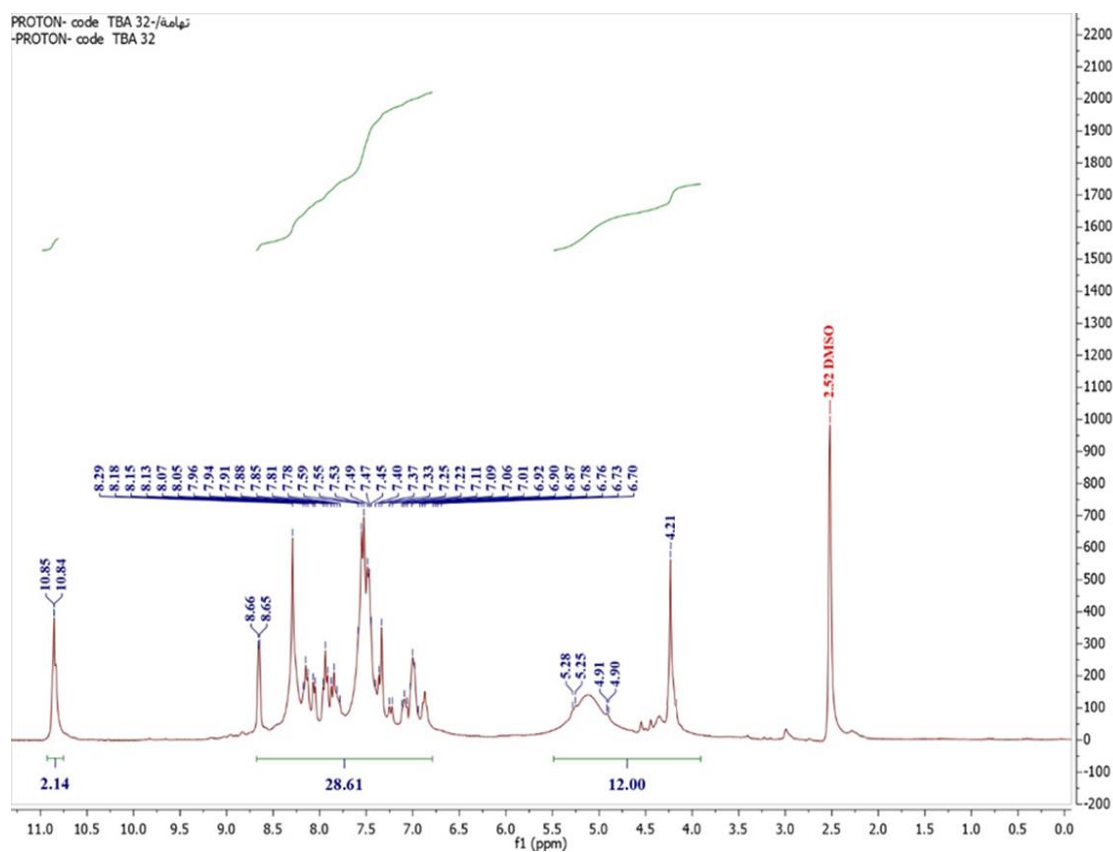

Figure S13.  $^1\text{H}$  nmr spectrum of complex (7)

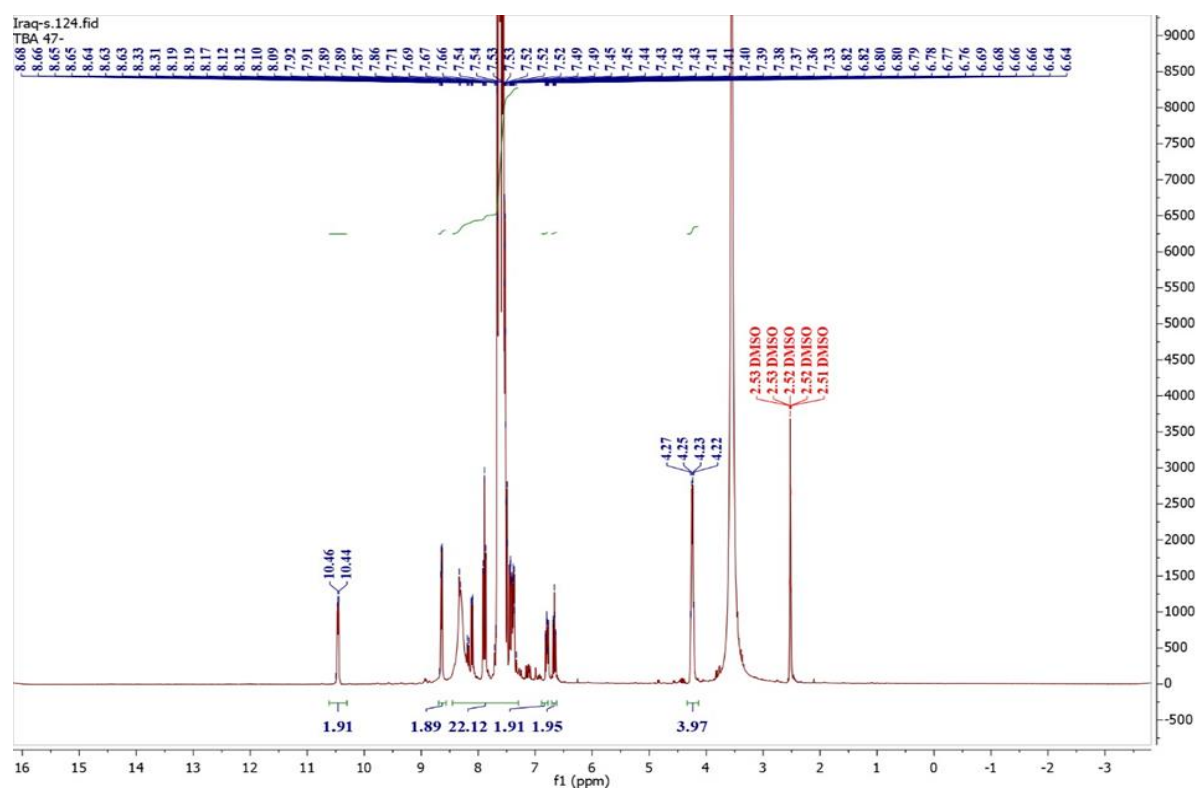

Supplement: s1 [file s1]
